# Supplementary material
Source: Springer Nature journal article supplement (https://www.springermedizin.de/resource/supplementary/12890_2013_603_MOESM6_ESM.pdf/9505426)

### Non-cardiac patients

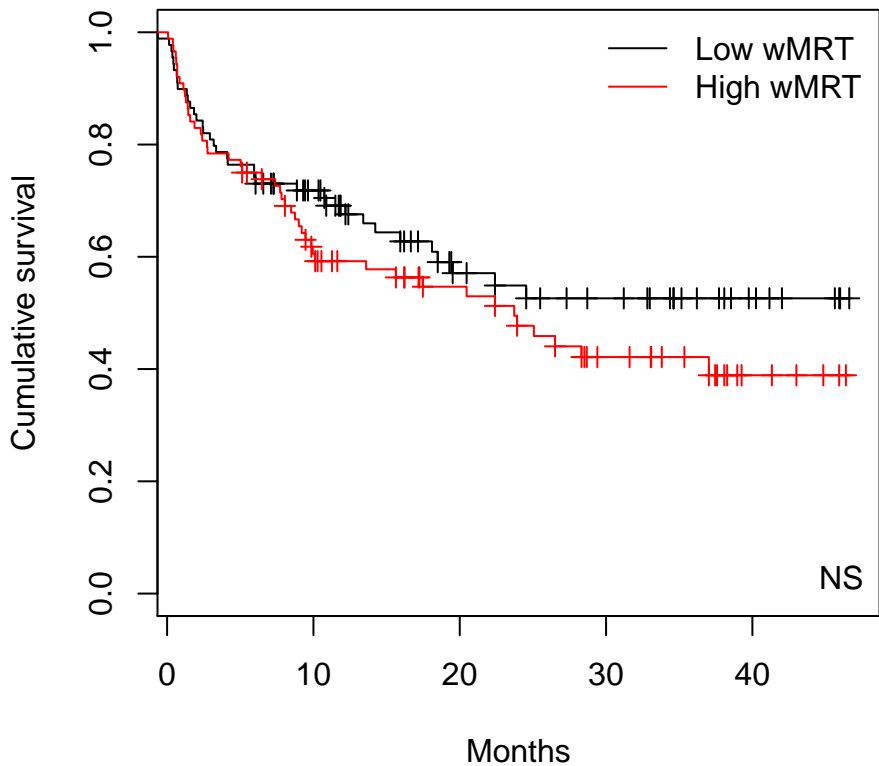

### Cardiac patients

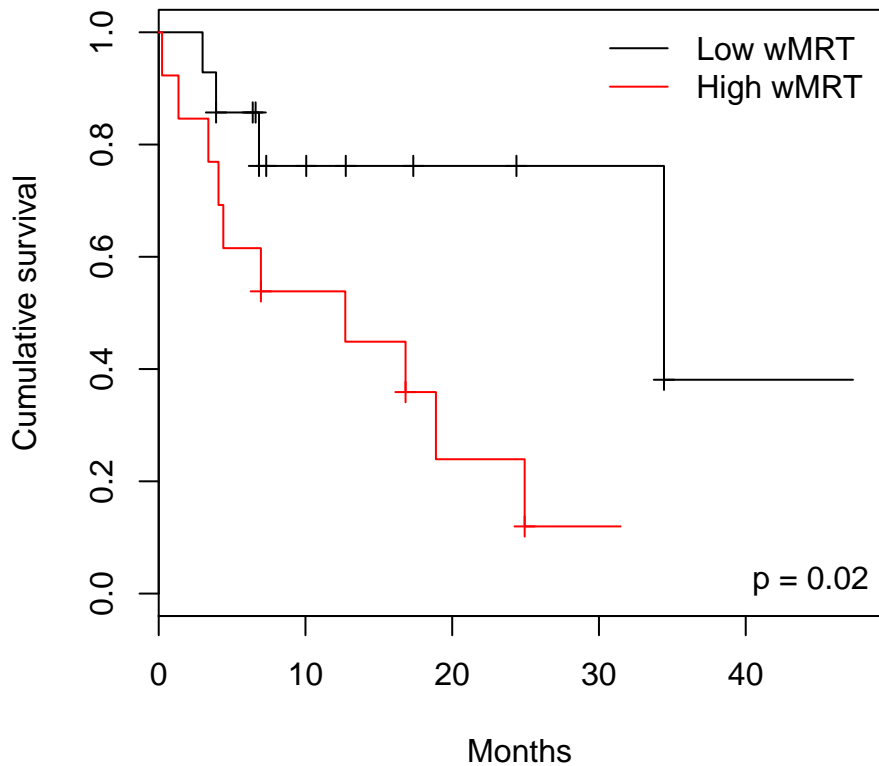

Supplement: MOESM6 [file 9505426]
